# Supplementary figures and images for: The ERM proteins interact with the HOPS complex to regulate the maturation of endosomes
Source: PubMed Central journal article supplement — Mol Biol Cell. 2011 Feb 1;22(3):375–85. doi: 10.1091/mbc.E10-09-0796 (PMC3031467; doi:10.1091/mbc.e10-09-0796), 2011-02-01

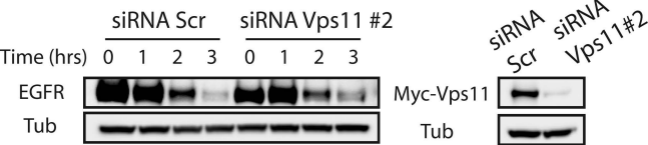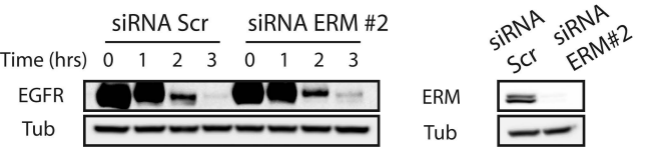

**A**

Alexa555-EGF / EEA1

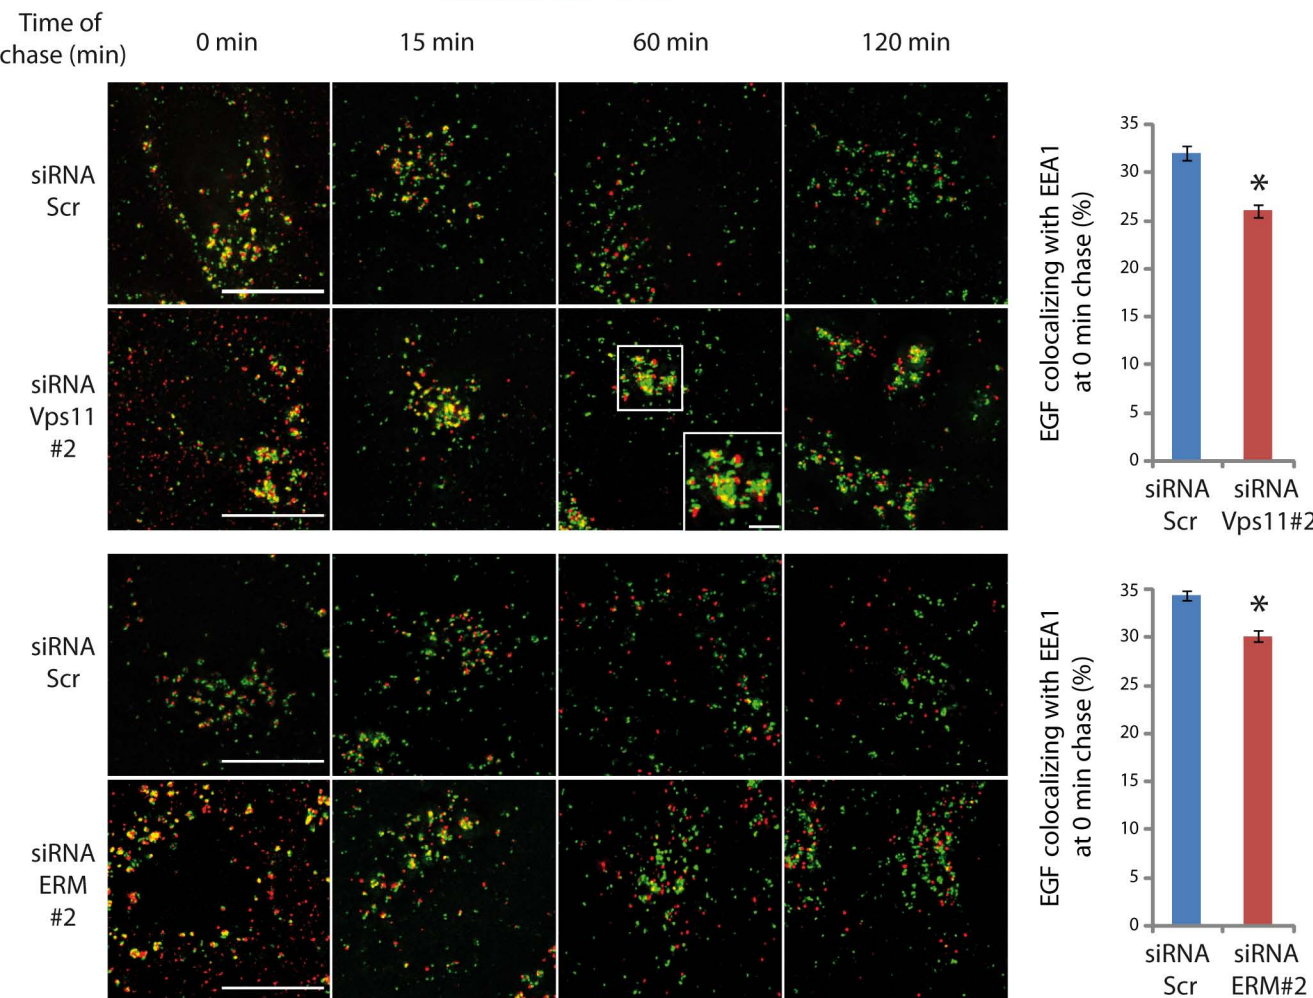**B**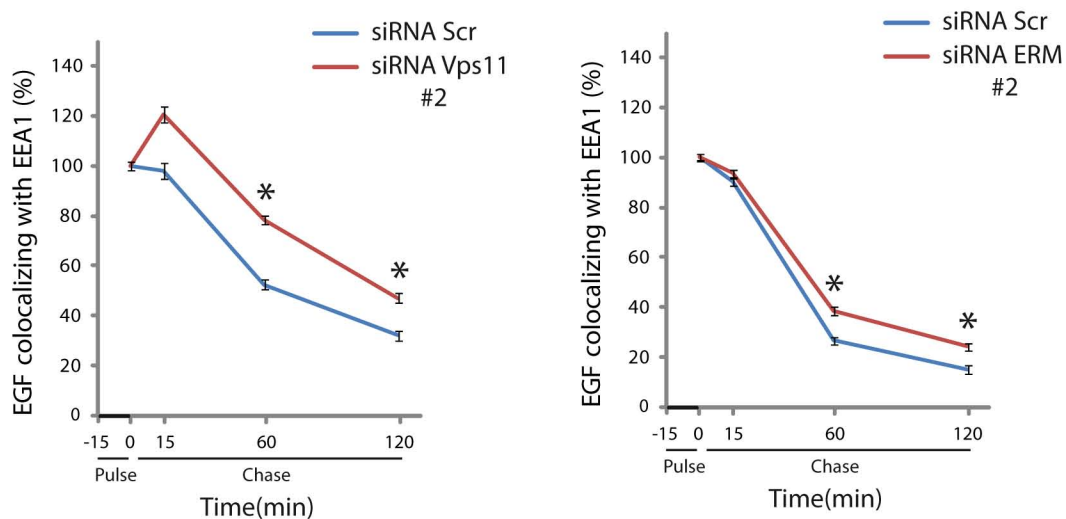

**A**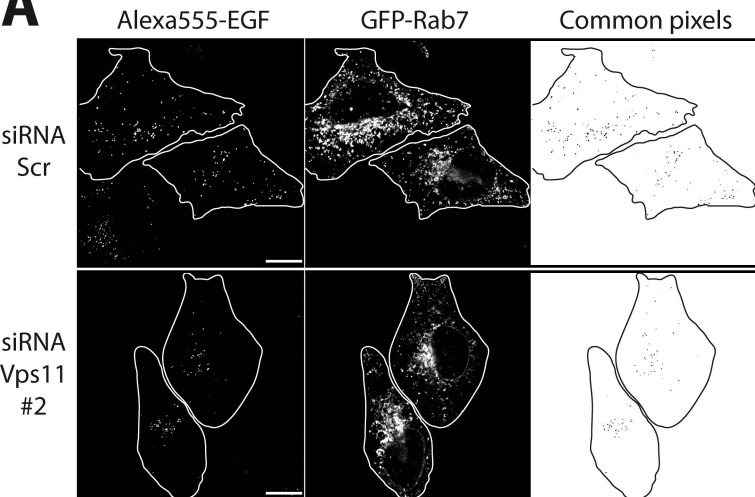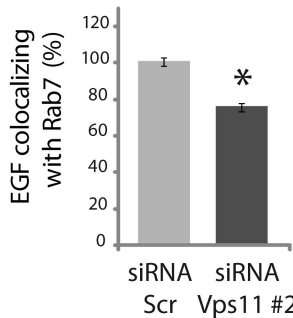**B**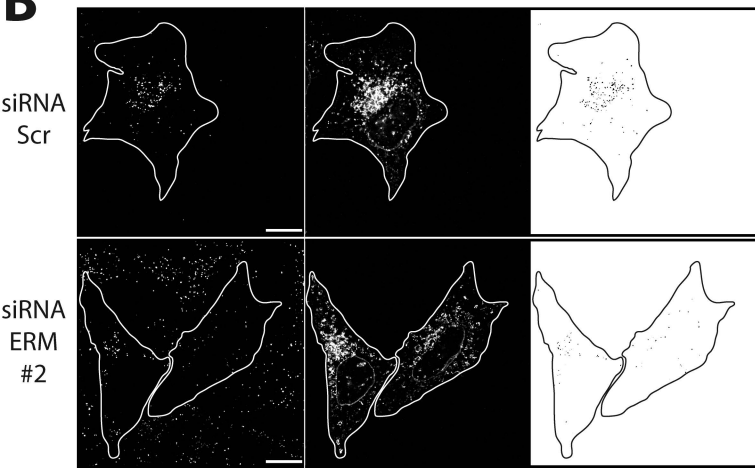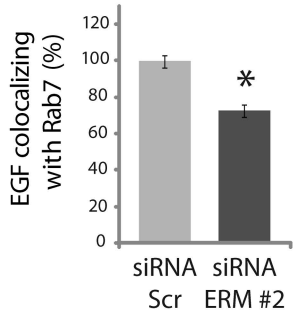

**A**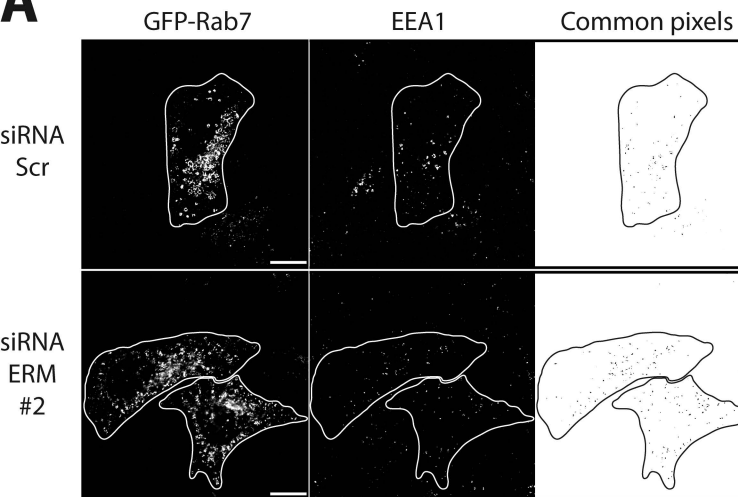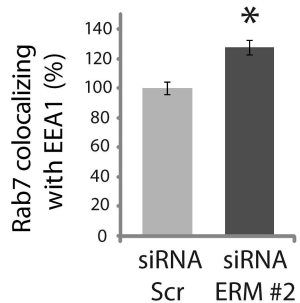**B**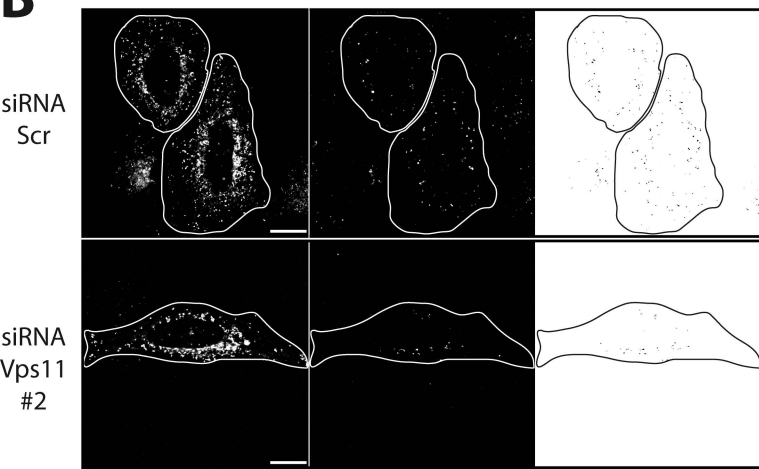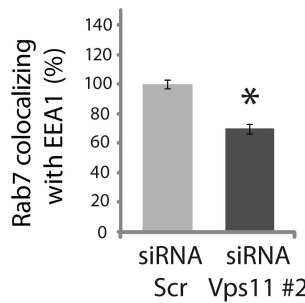

Supplement: E10-09-0796_1.pdf [file E10-09-0796_1.pdf]
